# Supplementary material for: Immune activation of the host cell induces drug tolerance in Mycobacterium tuberculosis both in vitro and in vivo
Source: PubMed Central journal article supplement — J Exp Med. 2016 May 2;213(5):809–25. doi: 10.1084/jem.20151248 (PMC4854729; doi:10.1084/jem.20151248), 2016-05-02
Supplement: supp_jem.20151248_JEM_20151248_sm.pdf [file supp_jem.20151248_JEM_20151248_sm.pdf]

## SUPPLEMENTAL MATERIAL

Liu et al., <http://www.jem.org/cgi/content/full/jem.20151248/DC1>

Table S1. Comparison of macrophage-specific induced genes common to all four drugs to those genes induced by in vitro stimuli

| In vitro stimulus                                              | Reference list size | Overlap with macrophage-specific commonly induced list | Overlap by random chance | Overlap significance |
|----------------------------------------------------------------|---------------------|--------------------------------------------------------|--------------------------|----------------------|
| Acid stress <sup>a</sup>                                       | 291                 | 28                                                     | 6                        | P < 0.001            |
| Nutrient starvation <sup>b</sup>                               | 440                 | 27                                                     | 9                        | P < 0.001            |
| Oxidative stress (H <sub>2</sub> O <sub>2</sub> ) <sup>c</sup> | 319                 | 23                                                     | 7                        | P < 0.001            |
| NO/CO/DosR-dependent hypoxia <sup>d</sup>                      | 50                  | 18                                                     | 1                        | P < 0.001            |
| SDS-mediated membrane damage <sup>e</sup>                      | 211                 | 27                                                     | 5                        | P < 0.001            |
| Triton X-100-mediated membrane damage <sup>f</sup>             | 73                  | 22                                                     | 3                        | P < 0.001            |

<sup>a</sup>Data from Rohde et al. (2007).

<sup>b</sup>Data from Betts et al. (2002) and Hampshire et al. (2004).

<sup>c</sup>Data from Schnappinger et al. (2003) and Voskuil et al. (2011).

<sup>d</sup>Data from Sherman et al. (2001), Ohno et al. (2003), Park et al. (2003), Shiloh et al. (2008), Voskuil et al. (2003), and Kumar et al. (2008).

<sup>e</sup>Data from Manganeli et al. (2001) and He et al. (2006).

<sup>f</sup>Data from He et al. (2006).

Table S2. Regulons that are commonly regulated by different frontline drugs in macrophages

| Regulator        | Regulon size | Overlap with macrophage-specific commonly induced list | Overlap by random chance | Overlap significance |
|------------------|--------------|--------------------------------------------------------|--------------------------|----------------------|
| Rv3133c (DosR)   | 50           | 18                                                     | 1                        | P < 0.001            |
| Rv0757 (PhoP)    | 505          | 42                                                     | 14                       | P < 0.001            |
| Rv0981 (MprA)    | 275          | 34                                                     | 7                        | P < 0.001            |
| Rv1404           | 19           | 8                                                      | <1                       | P < 0.001            |
| Rv3058c          | 136          | 13                                                     | 3                        | P < 0.001            |
| Rv0195           | 21           | 5                                                      | <1                       | P < 0.001            |
| Rv3223c (SigH)   | 95           | 9                                                      | 2                        | P < 0.001            |
| Rv3676 (Crp)     | 43           | 6                                                      | 1                        | P < 0.001            |
| Rv3291c (IrpA)   | 7            | 3                                                      | <1                       | P < 0.001            |
| Rv2760c (VapB42) | 8            | 3                                                      | <1                       | P < 0.001            |
| Rv0135c          | 2            | 2                                                      | <1                       | P < 0.001            |
| Rv0023           | 489          | 21                                                     | 11                       | P = 0.002            |
| Rv0081           | 283          | 14                                                     | 6                        | P = 0.004            |
| Rv0445c (SigK)   | 33           | 4                                                      | 1                        | P = 0.006            |

Regulon data for DosR, PhoP, and MprA are from Sherman et al. (2001), Ohno et al. (2003), Park et al. (2003), He et al. (2006), Kumar et al. (2008), Shiloh et al. (2008), Abramovitch et al. (2011), and Voskuil et al. (2003) and were obtained using regulator deletion strains; data for the rest regulators are from Rustad et al. (2014) and were generated using regulator overexpression strains. Regulons are ordered by overlap significance.

**Table S3 is provided as an Excel file and lists macrophage-specific INH-induced genes.**

**Table S4 is provided as an Excel file and lists genes differentially regulated by individual drugs in macrophages.**

**Table S5 is provided as an Excel file and lists genes commonly regulated by different frontline drugs in macrophages.**

**Table S6 is provided as an Excel file and lists macrophage-specific commonly induced genes.**

## REFERENCES

- Abramovitch, R.B., K.H. Rohde, F.F. Hsu, and D.G. Russell. 2011. *aprABC*: a *Mycobacterium tuberculosis* complex-specific locus that modulates pH-driven adaptation to the macrophage phagosome. *Mol. Microbiol.* 80:678–694. <http://dx.doi.org/10.1111/j.1365-2958.2011.07601.x>
- Betts, J.C., P.T. Lukey, L.C. Robb, R.A. McAdam, and K. Duncan. 2002. Evaluation of a nutrient starvation model of *Mycobacterium tuberculosis* persistence by gene and protein expression profiling. *Mol. Microbiol.* 43:717–731. <http://dx.doi.org/10.1046/j.1365-2958.2002.02779.x>
- Hampshire, T., S. Soneji, J. Bacon, B.W. James, J. Hinds, K. Laing, R.A. Stabler, P.D. Marsh, and P.D. Butcher. 2004. Stationary phase gene expression of *Mycobacterium tuberculosis* following a progressive nutrient depletion: a model for persistent organisms? *Tuberculosis (Edinb.)*. 84:228–238. <http://dx.doi.org/10.1016/j.tube.2003.12.010>
- He, H., R. Hovey, J. Kane, V. Singh, and T.C. Zahrt. 2006. MprAB is a stress-responsive two-component system that directly regulates expression of sigma factors SigB and SigE in *Mycobacterium tuberculosis*. *J. Bacteriol.* 188:2134–2143. <http://dx.doi.org/10.1128/JB.188.6.2134-2143.2006>

- Kumar, A., J.S. Deshane, D.K. Crossman, S. Bolisetty, B.S. Yan, I. Kramnik, A. Agarwal, and A.J. Steyn. 2008. Heme oxygenase-1-derived carbon monoxide induces the *Mycobacterium tuberculosis* dormancy regulon. *J. Biol. Chem.* 283:18032–18039. <http://dx.doi.org/10.1074/jbc.M802274200>
- Manganelli, R., M.I. Voskuil, G.K. Schoolnik, and I. Smith. 2001. The *Mycobacterium tuberculosis* ECF sigma factor  $\sigma^E$ : role in global gene expression and survival in macrophages. *Mol. Microbiol.* 41:423–437. <http://dx.doi.org/10.1046/j.1365-2958.2001.02525.x>
- Ohno, H., G. Zhu, V.P. Mohan, D. Chu, S. Kohno, W.R. Jacobs Jr., and J. Chan. 2003. The effects of reactive nitrogen intermediates on gene expression in *Mycobacterium tuberculosis*. *Cell. Microbiol.* 5:637–648. <http://dx.doi.org/10.1046/j.1462-5822.2003.00307.x>
- Park, H.D., K.M. Guinn, M.I. Harrell, R. Liao, M.I. Voskuil, M. Tompa, G.K. Schoolnik, and D.R. Sherman. 2003. Rv3133c/dosR is a transcription factor that mediates the hypoxic response of *Mycobacterium tuberculosis*. *Mol. Microbiol.* 48:833–843. <http://dx.doi.org/10.1046/j.1365-2958.2003.03474.x>
- Rohde, K.H., R.B. Abramovitch, and D.G. Russell. 2007. *Mycobacterium tuberculosis* invasion of macrophages: linking bacterial gene expression to environmental cues. *Cell Host Microbe.* 2:352–364. <http://dx.doi.org/10.1016/j.chom.2007.09.006>
- Rustad, T.R., K.J. Minch, S. Ma, J.K. Winkler, S. Hobbs, M. Hickey, W. Brabant, S. Turkarslan, N.D. Price, N.S. Baliga, and D.R. Sherman. 2014. Mapping and manipulating the *Mycobacterium tuberculosis* transcriptome using a transcription factor overexpression-derived regulatory network. *Genome Biol.* 15:502. <http://dx.doi.org/10.1186/s13059-014-0502-3>
- Schnappinger, D., S. Ehrhart, M.I. Voskuil, Y. Liu, J.A. Mangan, I.M. Monahan, G. Dolganov, B. Efron, P.D. Butcher, C. Nathan, and G.K. Schoolnik. 2003. Transcriptional adaptation of *Mycobacterium tuberculosis* within macrophages: insights into the phagosomal environment. *J. Exp. Med.* 198:693–704. <http://dx.doi.org/10.1084/jem.20030846>
- Sherman, D.R., M. Voskuil, D. Schnappinger, R. Liao, M.I. Harrell, and G.K. Schoolnik. 2001. Regulation of the *Mycobacterium tuberculosis* hypoxic response gene encoding  $\alpha$ -crystallin. *Proc. Natl. Acad. Sci. USA.* 98:7534–7539. <http://dx.doi.org/10.1073/pnas.121172498>
- Shiloh, M.U., P. Manzanillo, and J.S. Cox. 2008. *Mycobacterium tuberculosis* senses host-derived carbon monoxide during macrophage infection. *Cell Host Microbe.* 3:323–330. <http://dx.doi.org/10.1016/j.chom.2008.03.007>
- Voskuil, M.I., D. Schnappinger, K.C. Visconti, M.I. Harrell, G.M. Dolganov, D.R. Sherman, and G.K. Schoolnik. 2003. Inhibition of respiration by nitric oxide induces a *Mycobacterium tuberculosis* dormancy program. *J. Exp. Med.* 198:705–713. <http://dx.doi.org/10.1084/jem.20030205>
- Voskuil, M.I., I.L. Bartek, K. Visconti, and G.K. Schoolnik. 2011. The response of *Mycobacterium tuberculosis* to reactive oxygen and nitrogen species. *Front. Microbiol.* 2:105. <http://dx.doi.org/10.3389/fmicb.2011.00105>
